# Supplementary material for: The Tropical Basin Interaction Model Intercomparison Project (TBIMIP)
Source: Copernicus journal article supplement (doi:10.5194/egusphere-2024-3110), 2024-11-04
Supplement: Supplementary file [file egusphere-2024-3110-AC1-supplement.pdf]

## Response to Reviewer #1 (Michael Alexander)

Thank you for your constructive and insightful comments. We hope that we have addressed them adequately. Below are our responses (in blue). If not otherwise mentioned, line numbers refer to the revised manuscript (without tracked changes).

### Major comments

1) The manuscript could include a few figures from observations or previous experiments illustrating potential interactions and hypotheses to be explored, in addition to the schematic shown in Fig. 1.

We have added two figures (number 2 and 3 in the revised manuscript) that highlight the interdecadal modulation of the equatorial Atlantic influence on ENSO, and the influence of the northern tropical Atlantic on ENSO. In addition, Fig. 4 (previous Fig. 2) illustrates the inconsistent influence of ENSO on the equatorial Atlantic.

2) For many in the oceanography community “hindcast” is used to describe long simulations driven by atmospheric reanalysis (and ocean reanalyses) for regional models. (This is called a historical simulation here.) You might choose to use “re-forecasts” instead of “hindcasts” or add a sentence or two explaining how “hindcast” is being used in this context.

We have added a note regarding our use of the term “hindcast”: “We note that we use “hindcast” in the sense of “reforecast”, i.e. seasonal prediction experiments that are initialized from past observations.”

3) Will the tapering method as a function of latitude (e.g., linear decrease with latitude) be prescribed to be the same across all experiments?

Yes, linear tapering will be used across all experiments. This was mentioned in line 201 of the original manuscript (now l. 234).

4) Can an explanation be provided for why the start of the tapering latitude is different in the Atlantic compared with the other two basins.

The choice was made based on the narrower region of deep convection in the tropical Atlantic, and the fact that previous studies have found unrealistic fluxes when SST restoring was used in the northern subtropical Atlantic (Kim et al. 2020; O’Reilly et al. 2023; Kim et al. 2024). This was already discussed in section 4.3 (now ll. 363-366). In addition, we now reference this explanation when we first mention the restoring regions in section 3 (ll. 233-234).

5) lines 217-218: States: “The technique for initializing the hindcasts (data assimilation etc.) is left to the modelling groups.” This could lead to major differences between the hindcasts (re-forecasts) especially in the first couple of months. Perhaps some tests with a single modeling system could be performed to investigate how much different initialization methods influence the forecast spread and perhaps how long it took for initialization differences not to have a notable influence on the re-forecasts (in a probabilistic sense).

The original idea was to require SST nudging as the initialization method for the reforecasts, but this would have meant additional effort and simulations, as most groups use some kind of 3D

data assimilation. It was therefore decided to let each group choose their own initialization method.

The SINTEX-F2 model uses both 3DVAR data assimilation and SST nudging for forecast initialization (12 ensemble members each). We have calculated the anomaly correlation coefficient (ACC) and the spread (standard deviation of the ensemble members) for the reforecast period 1991-2020 (Figs. R1 and R2, respectively). There is a systematic ACC increase in the eastern tropical Pacific and northern tropical Atlantic for the 3DVAR ensemble (Fig. R1), and systematic spread decrease in the equatorial Pacific (Fig. R2).

The differences described above increase with lead time, indicating that the initialization method has a lasting impact in some regions. Nevertheless, what is important for our purposes, is the changes relative to the control reforecast. We believe that these relative changes should not be too sensitive to the initialization method. We cannot rule out, however, that there is a systematic impact, and will try to investigate this in future experiments, potentially as part of the Tier 3 experiments. This is now mentioned in the revised manuscript (ll. 254-256).

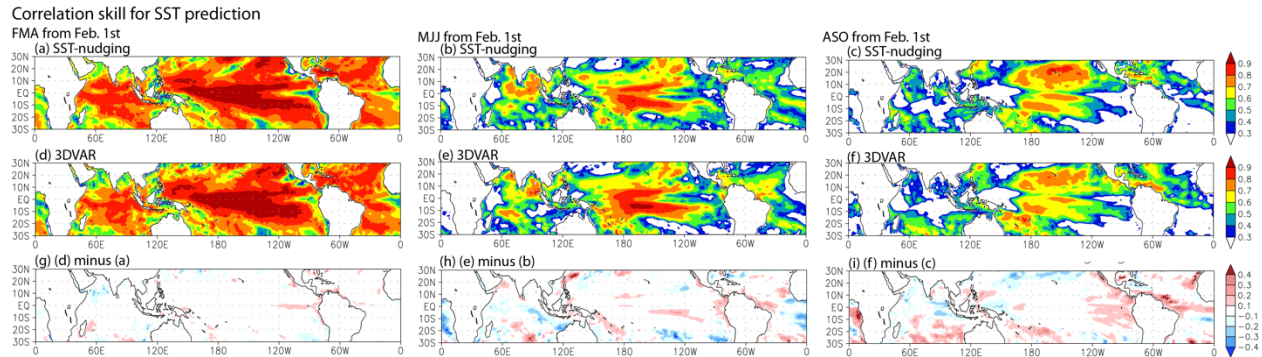

**Figure R1.** ACC of SST for predictions initialized on February 1 for FMA (left column), MJJ (center column), and ASO (right column). The top row shows the ensemble mean of the predictions initialized with SST-nudging, the middle row shows the ensemble mean of the 3DVAR-initialized predictions, and the bottom row the difference between the two.

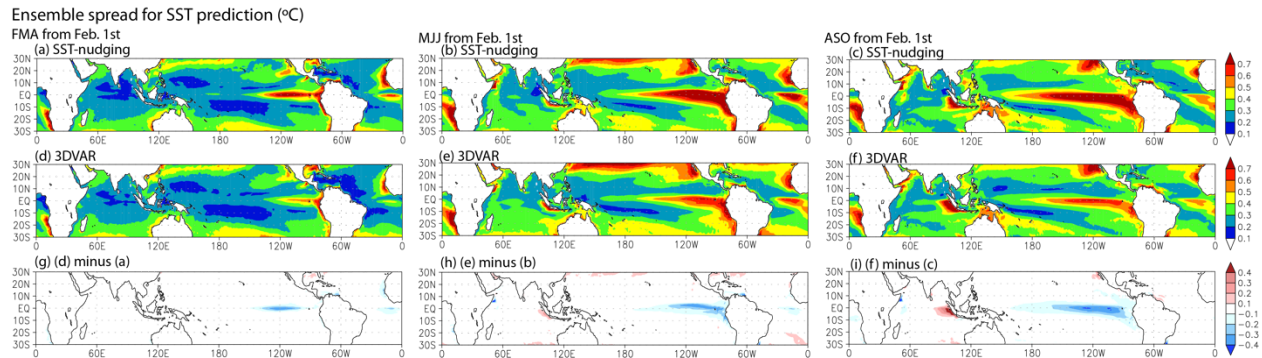

**Figure R2.** Like R1, but for inter-ensemble standard deviation (spread).

6) Lines 250-260 state:

"The top ocean level interacts with the atmospheric model component through a coupler routine (e.g., Craig et al. 2017), which regulates the exchange of fluxes between the atmosphere and ocean. Another approach for modifying SSTs is therefore through manipulating inside the coupler routine the heat flux that goes into the ocean, which is the method recommended for the TBIMIP experiments. The heat flux in tropical regions consists of four components: net surface

shortwave radiation, net surface longwave radiation, latent heat flux, and sensible heat flux. Of these, the sensible heat flux is usually chosen for manipulation (e.g., Kosaka and Xie 2013), and this is the method recommended for TBIMIP. Finally, because the flux coupler controls the SSTs that are “seen” by the atmospheric component, one can modify only this value, thereby “tricking” the atmosphere into reacting to a temperature that is different from the actual ocean SST. This approach leaves the ocean component completely unchanged (Richter and Doi 2019). Furthermore, it allows the SSTs to exactly follow a given distribution (as far as the atmosphere is concerned), rather than approximating it through correction terms. A potential drawback is that this can lead to very unrealistic heat fluxes into the atmosphere (Wang et al. 2005)."

And then on lines 281-282:

"Because the heat flux is absorbed in the top layer first, the immediate temperature response could lead to unrealistic changes in vertical stability"

These two statements seem contradictory, the top implying that you are not actually changing the ocean but just tricking it to see the altered state and the latter indicating an actual change in the ocean. Please clarify.

We have edited the manuscript to clarify that section 4.2 describes three different methods for constraining SSTs (ll. 282-283), and that the recommended method is through an additional heat flux term (method 2). As stated at the top of section 4.3, the discussion in this section only concerns method 2.

7) Lines 359-361: State “The curves essentially collapse into one, suggesting that the bias of a given model is mostly time-invariant. We conclude that using a shorter base period should not lead to major imbalances though this should be carefully evaluated for each model.”

It may be worth exploring the results described in the paper:

Beverley, J.D., Newman, M. & Hoell, A. Climate model trend errors are evident in seasonal forecasts at short leads. *npj Clim Atmos Sci* 7, **285** (2024). <https://doi.org/10.1038/s41612-024-00832-w>

We have modified this statement to reflect the trend error at the beginning of the 21st century (ll. 404-406). The study by Beverley et al. (2024) is now cited, along with Kosaka and Xie (2013) and Wills et al. (2022).

8) Additional Tier 3 Experiments. The paper discusses a number of potential Tier 3 (optional) experiments using a hierarchy of models. Several of the proposed experiments are interesting and could be run relatively inexpensively. Here are some additional ones the project could consider:

- Use LIM or other methods to remove ENSO’s (or other modes) impact on the observed SST anomalies in the other basins. The SST anomalies that are damped towards would remove this impact on the SST anomalies in the other basins and use those adjusted anomalies in either the historical or hindcast simulations. For example, the impact of ENSO on the tropical Atlantic could be estimated from observations and that part of the anomaly signal removed from the observed SST anomalies that are used in the TBI-PACE-AANOM experiment.
- Specify the observed winds or wind anomalies added to the model’s climatological winds in the forcing regions rather than the SST (or SSTA). Since the oceans are primarily driven by winds in the tropics, both by the surface heat fluxes and dynamics (Ekman, upwelling, etc.). This might reduce or nearly eliminate the heat imbalance by

relaxing the heat into the ocean (although other issues might arise). A similar experiment design was used in

Ding, H., R. J. Greatbatch, M. Latif, W. Park, and R. Gerdes, 2013: Hindcast of the 1976/77 and 1998/99 Climate Shifts in the Pacific. *J. Climate*, 26, 7650–7661, <https://doi.org/10.1175/JCLI-D-12-00626.1>.

- Base the temperature restoring term on the anomalous heat flux convergence in the ocean obtained from ocean reanalyses to estimate the ocean driven SST variability that is communicated to other basins.

Thank you for the valuable suggestions. We will consider those in our future discussions.

### **Minor comments**

1) line 46: I suggest not using the colloquial expression “players” on line 46. Perhaps “processes” instead.

Changed to “processes”.

2) Lines 150-151: Suggest changing “a wealth of intercomparisons has been performed” to “a wide-range of intercomparisons have been performed”

Done.
